# Supplementary material for: Experimental evidence reveals the UCP1 genotype changes the oxygen consumption attributed to non-shivering thermogenesis in humans
Source: PubMed Central journal article supplement (PMC5514118; doi:10.1038/s41598-017-05766-3), 2017-07-17
Supplement: 41598_2017_5766_MOESM1_ESM.pdf [file 41598_2017_5766_MOESM1_ESM.pdf]

## Supplementary Materials

### **Experimental evidence reveals the *UCP1* genotype changes the oxygen consumption attributed to non-shivering thermogenesis in humans**

Takayuki Nishimura<sup>1,4</sup>, Takafumi Katsumura<sup>2,4</sup>, Midori Motoi<sup>1</sup>, Hiroki Oota<sup>2\*</sup>, Shigeki Watanuki<sup>3\*</sup>

<sup>1</sup>Department of Biomedical Sciences, Nagasaki University, 1-12-4 Sakamoto, Nagasaki, 852-8523, Japan.

<sup>2</sup>Department of Anatomy, Kitasato University School of Medicine, 1-15-1 Kitasato, Minami-ku, Sagami-hara, Kanagawa, 252-0374, Japan.

<sup>3</sup>Department of Human Science, Kyushu University, 4-9-1 Shiobaru, Minami-ku, Fukuoka, 815-8540, Japan.

<sup>4</sup>These authors contributed equally to this work.

\*Correspondence should be addressed to H.O. (hiroki\_oota@med.kitasato-u.ac.jp) or S.W. (watanuki@design.kyushu-u.ac.jp).

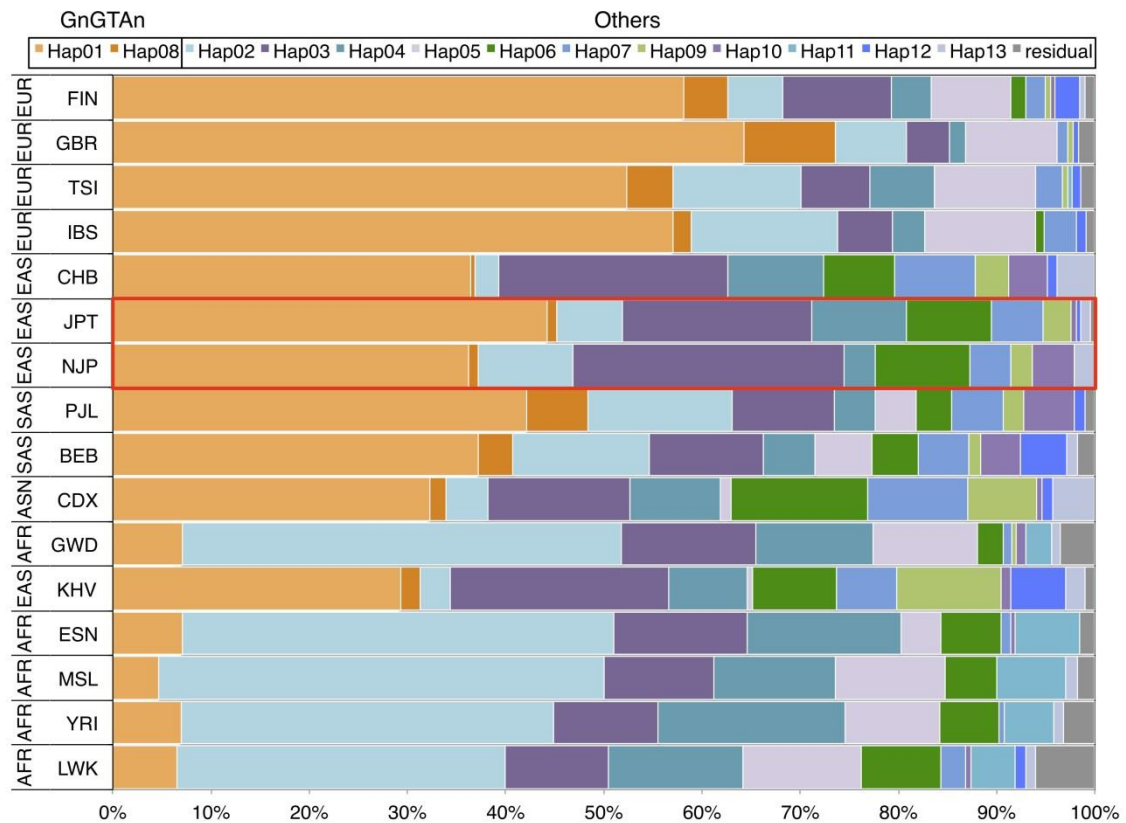

**Supplementary Fig. S1. Haplotype frequency of *UCPI* based on 6 SNPs genotyped in this study.** Red frame showed a comparison of the haplotype frequency between JPT and NJP, which no difference in the frequency was observed ( $P = 0.148$ , Fisher's Exact Test). These populations in the graph are arranged in descending order of latitude. The abbreviations used are described in Fig. 2.

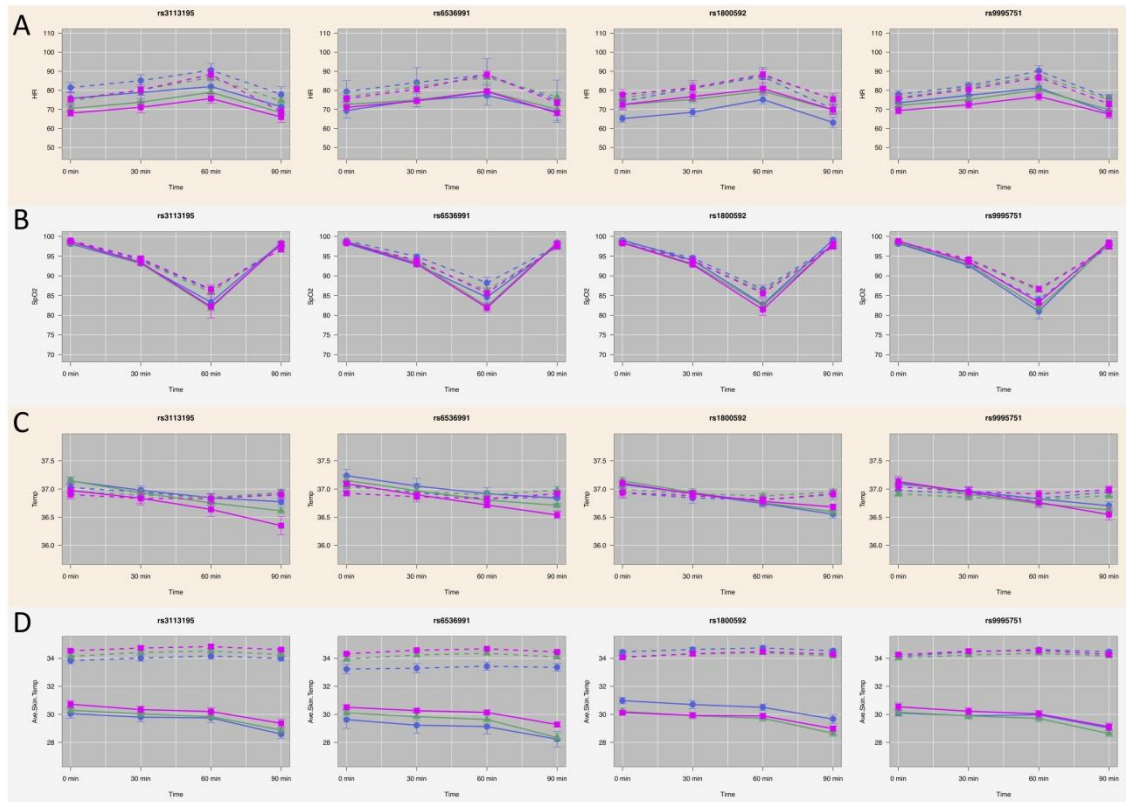

**Supplementary Fig. S2. Time series variations of physiological data in each SNP and genotype (A: Heart rate; B: SpO<sub>2</sub>; C: Rectal temperature; D: Skin temperature).** The solid and dashed lines show the changes under 16 and 28 degrees Celsius, respectively. The colors of the lines represent each genotype (blue: a homozygote of an ancestral allele; magenta: a homozygote of a derived allele; green: heterozygote of ancestral/derived alleles).

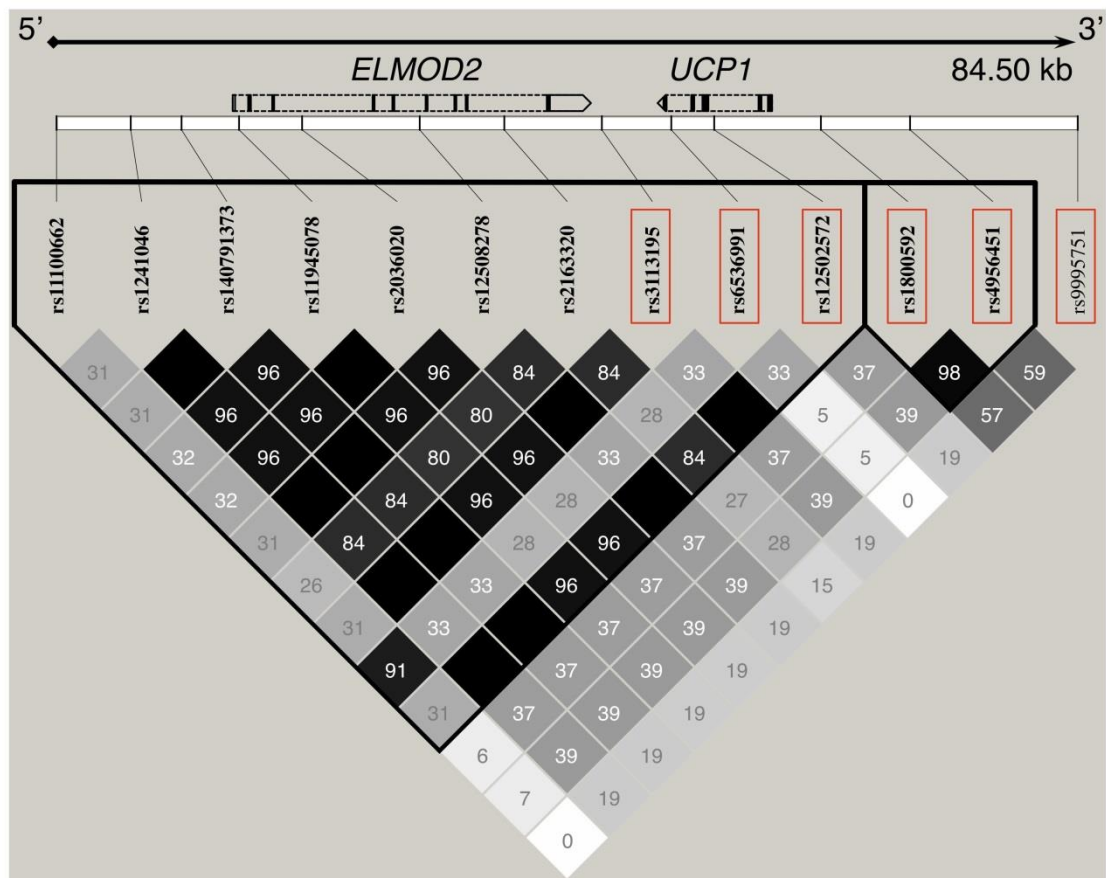

**Supplementary Fig. S3. LD structure around the *UCP1* and *ELMOD2* genes. A pairwise  $r^2$  value is shown in each square. Darker gradient color indicates higher  $r^2$  values, and black indicates an  $r^2$  of 1. The haplotype block defined by the Gabriel et al. method<sup>31</sup> is represented by the enclosure of the black line. The red frame indicates the SNP genotyped in this study.**

**Supplementary Table S1.** The results of a multiple regression analysis to examine the association of BM, BMI and BSA with  $\Delta VO_2$  (90min-60min). BM: Basal metabolic rate; BMI: Body mass index; BSA: Body surface area.

| Explanatory variables | Response variable           |       |                |
|-----------------------|-----------------------------|-------|----------------|
|                       | $\Delta VO_2$ (90min-60min) |       |                |
|                       | Coefficients                | S.E.  | <i>p</i> value |
| (Intercept)           | 0.511                       | 0.156 | 0.002          |
| BM                    | -0.114                      | 0.196 | 0.563          |
| BMI                   | -0.400                      | 0.289 | 0.174          |
| BSA                   | 0.274                       | 0.275 | 0.325          |

**Supplementary Table S2.** Comparisons of Spearman rank correlation coefficients in this study and Hancock et al. (2011).

| Haplotype or SNP | Database     | Spearman's rho |                         |
|------------------|--------------|----------------|-------------------------|
|                  |              | Latitude       | Mean annual temperature |
| GnGTAn           | 1000 Genomes | 0.94           | -0.76                   |
| rs1800592        | 1000 Genomes | 0.81           | -0.72                   |
| rs1800592        | HDGP         | 0.62           | -0.41                   |
